# Supplementary material for: Low Screening Rates Despite a High Prevalence of Significant Liver Fibrosis in People with Diabetes from Primary and Secondary Care
Source: MDPI journal article supplement (doi:10.3390/jcm10245755), 2021-12-09
Supplement: s1 [file s1]

# Supplementary material

## Low Screening Rates despite a High Prevalence of Significant Liver Fibrosis in People with Diabetes from Primary and Secondary Care

Laurence J Dobbie<sup>1</sup>, Mohamed Kassab<sup>2</sup>, Andrew S Davison<sup>3,4</sup>, Pete Grace<sup>4</sup>, Daniel J Cuthbertson<sup>1</sup>, Theresa J Hydes<sup>1,2\*</sup>

1: Department of Cardiovascular and Metabolic Medicine, Institute of Life Course and Medical Sciences, University of Liverpool, Liverpool, United Kingdom

2: Department of Gastroenterology and Hepatology, Liverpool University Hospitals Foundation Trust, Liverpool, United Kingdom

3: Department of Clinical Biochemistry and Metabolic Medicine, Liverpool Clinical Laboratories, Liverpool University Hospitals Foundation Trust, Liverpool, United Kingdom

4: Liverpool Clinical Laboratories, Liverpool University Hospitals Foundation Trust, Liverpool, United Kingdom

## Contents

- **Page 3:** Supplementary Table 1, Algorithms used to calculate Hepatic Steatosis Index and Fibrosis Scores
- **Page 4:** Supplementary Figure 1, Correlation between HbA1c and Fibrosis Marker Scores
- **Page 5:** Supplementary Figure 2, Percentage of people with a raised FIB-4 score according to Number of glucose lowering agents prescribed
- **Page 6:** Supplementary Figure 3, Percentage of people with a raised FIB-4 score according to subclasses of glucose lowering agents prescribed

**Table S1.** Algorithms used to calculate Hepatic Steatosis Index and Fibrosis Scores

|                                     |                                                                                                                   |
|-------------------------------------|-------------------------------------------------------------------------------------------------------------------|
| <b>Fibrosis-4 index (FIB-4)</b>     | $\text{Age (years)} \times \text{AST (U/l)} / (\text{platelets (x10}^9\text{/L)} \times \sqrt{\text{ALT (U/l)}})$ |
| <b>AST to platelet index (APRI)</b> | $((\text{AST (IU/L)} / \text{AST upper limit of normal (U/L)}) / \text{platelet (x10}^9\text{/L)}) \times 100$    |
| <b>AST:ALT ratio</b>                | $\text{ALT (U/l)} / \text{AST (U/l)}$                                                                             |

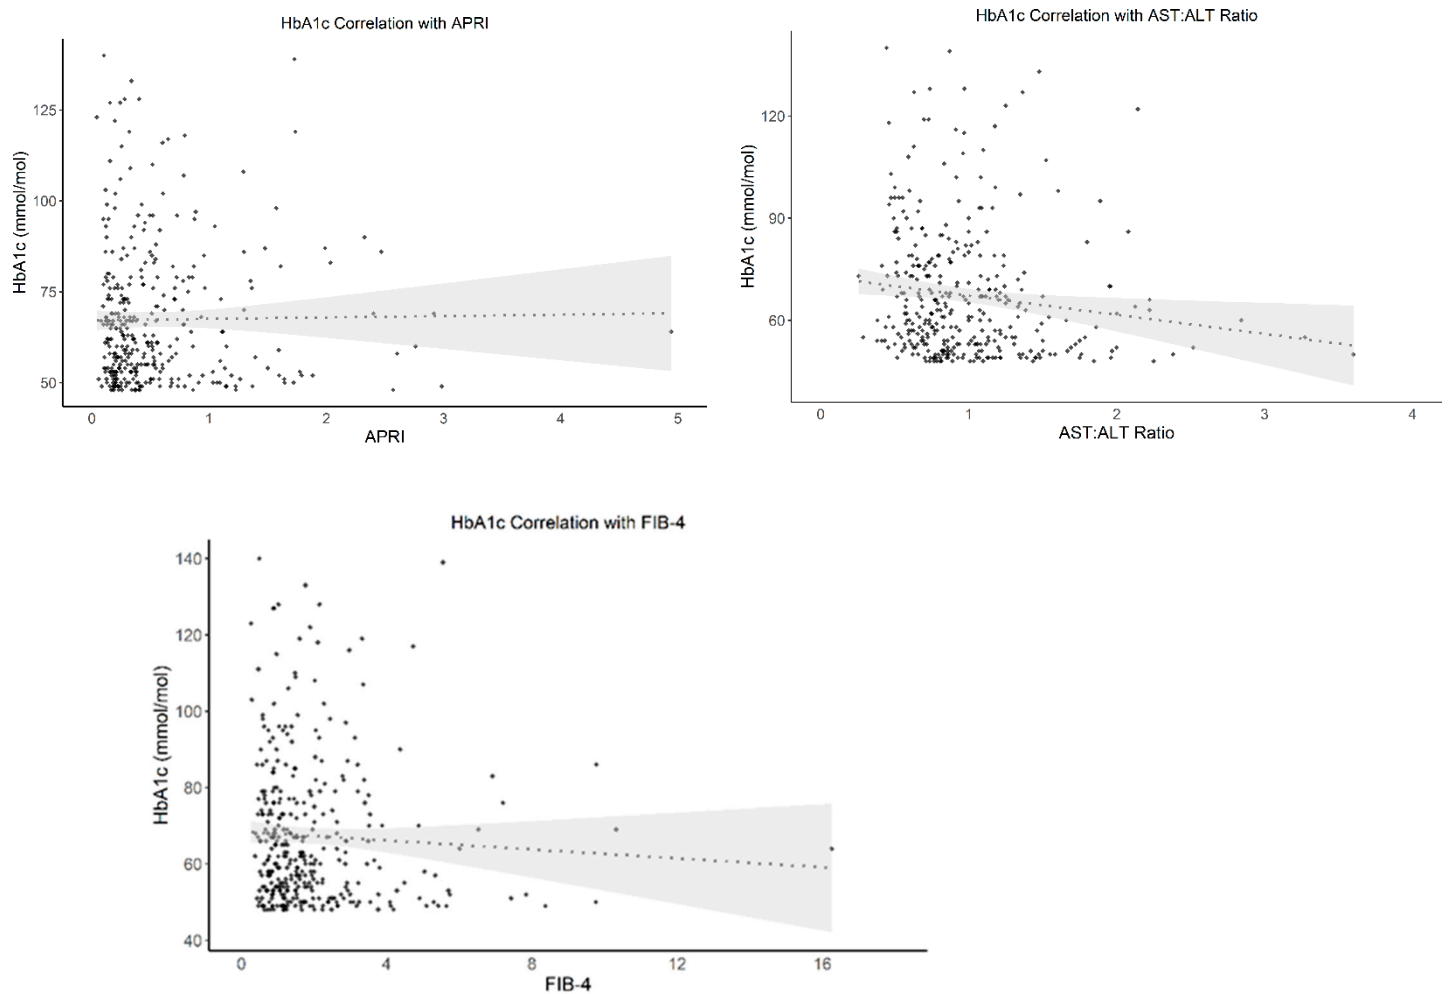

**Figure S1.** Correlation between HbA1c and Fibrosis Marker Scores

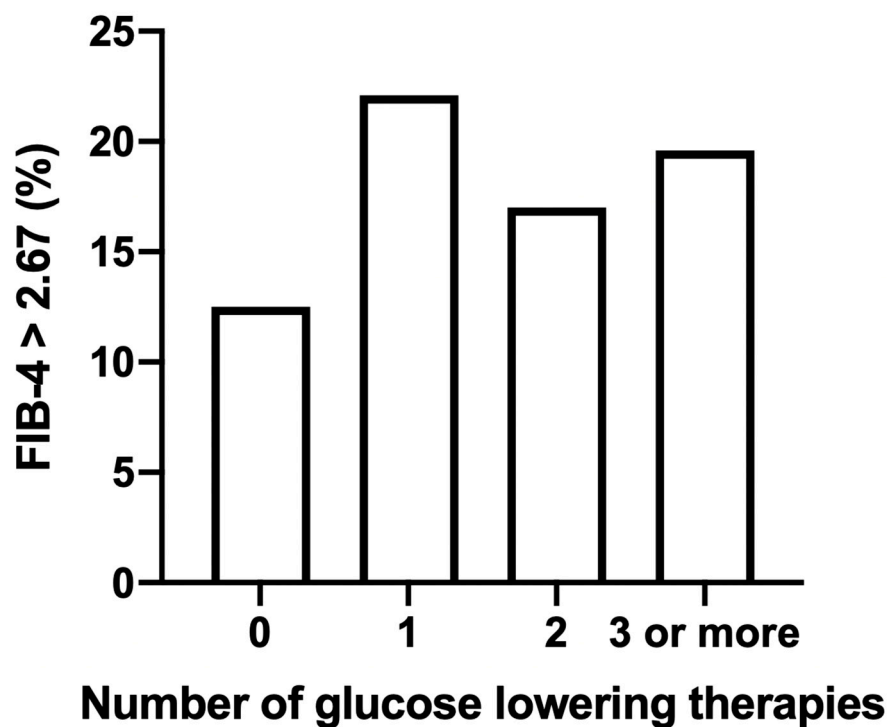

**Figure S2:** Percentage of people with a raised FIB-4 score according to Number of glucose lowering agents prescribed

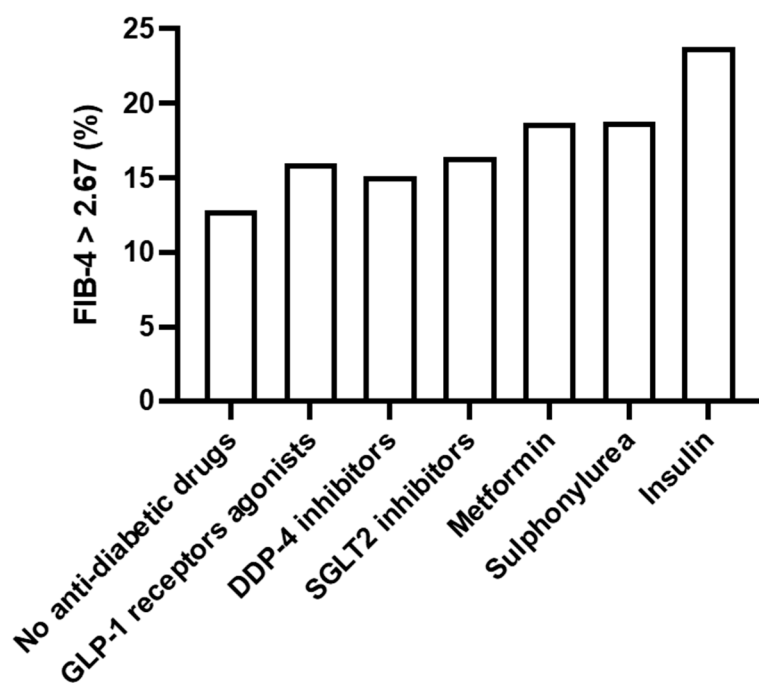

**Figure S3.** Percentage of people with a raised FIB-4 score according to subclasses of glucose lowering agents prescribed
